# Supplementary material
Source: publisher site journal article supplement (https://www.dovepress.com/article/325100)
Supplement: Supplementary file 1 [file get_supplementary_file.php]

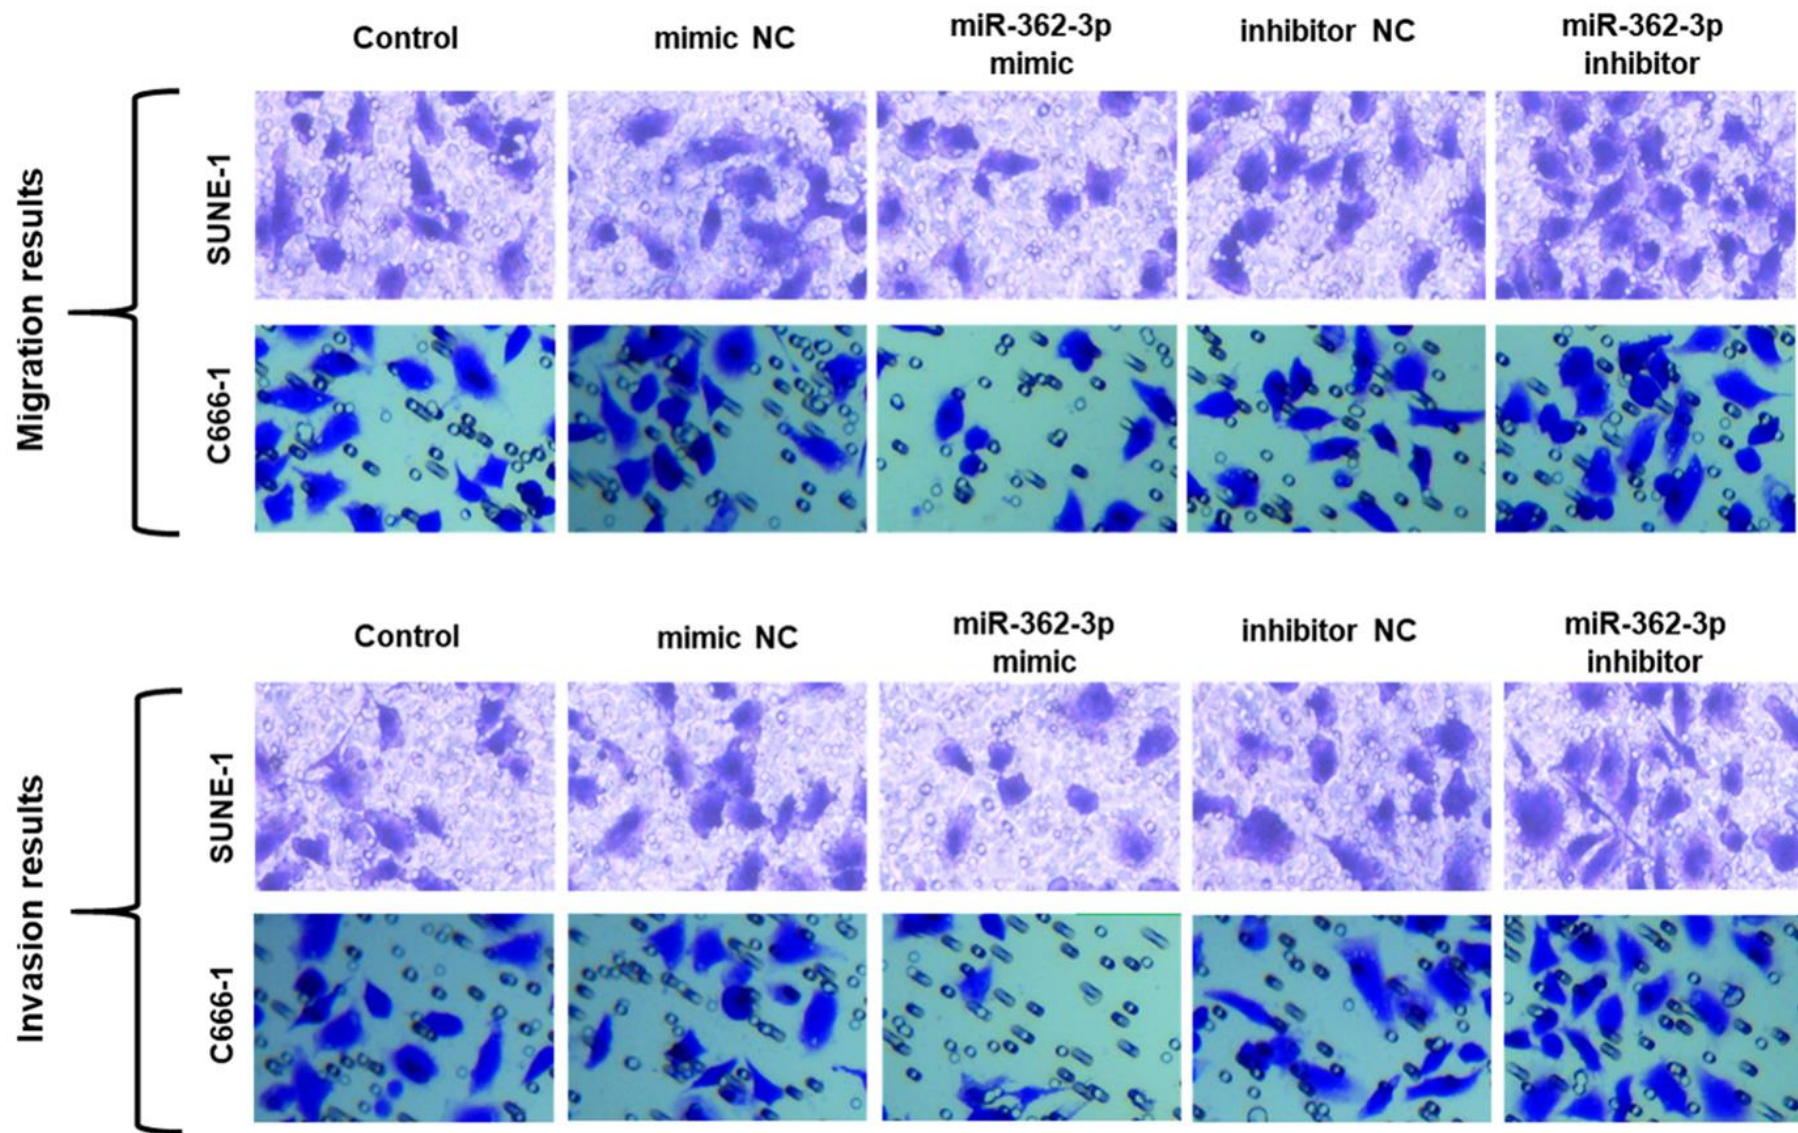

**Figure S1.** Transwell assay results for the migration and invasion of SUNE-1 and C666-1 cells (200 × magnification).
